# Supplementary material
Source: publisher figshare collection journal article supplement (https://acs.figshare.com/ndownloader/files/6007230)
Supplement: Supplementary file 1 [file 6007230]

HEADER    DWEYS                                                       
REMARK  99                                                                      
REMARK  99 MOE v2015.10 (Chemical Computing Group Inc.) Fri Jul  1 10:49:19 2016
ATOM      1  N   ASP   283      59.575 -45.647  15.778  1.00  0.00           N1+
ATOM      2  CA  ASP   283      60.177 -46.867  16.225  1.00  0.00           C  
ATOM      3  CB  ASP   283      60.338 -47.890  15.084  1.00  0.00           C  
ATOM      4  CG  ASP   283      58.962 -48.246  14.541  1.00  0.00           C  
ATOM      5  OD1 ASP   283      57.959 -47.676  15.046  1.00  0.00           O  
ATOM      6  OD2 ASP   283      58.899 -49.087  13.604  1.00  0.00           O1-
ATOM      7  C   ASP   283      61.562 -46.527  16.674  1.00  0.00           C  
ATOM      8  O   ASP   283      62.165 -47.248  17.466  1.00  0.00           O  
ATOM      9  H1  ASP   283      60.148 -45.233  15.056  1.00  0.00           H  
ATOM     10  H2  ASP   283      59.498 -45.006  16.555  1.00  0.00           H  
ATOM     11  H3  ASP   283      58.656 -45.840  15.409  1.00  0.00           H  
ATOM     12  HA  ASP   283      59.545 -47.296  17.002  1.00  0.00           H  
ATOM     13  HB2 ASP   283      60.825 -48.788  15.464  1.00  0.00           H  
ATOM     14  HB3 ASP   283      60.945 -47.457  14.288  1.00  0.00           H  
ATOM     15  N   TRP   284      62.121 -45.430  16.130  1.00  0.00           N  
ATOM     16  CA  TRP   284      63.496 -45.116  16.393  1.00  0.00           C  
ATOM     17  CB  TRP   284      63.950 -43.830  15.684  1.00  0.00           C  
ATOM     18  CG  TRP   284      65.397 -43.464  15.926  1.00  0.00           C  
ATOM     19  CD2 TRP   284      66.480 -43.880  15.077  1.00  0.00           C  
ATOM     20  CD1 TRP   284      65.953 -42.708  16.917  1.00  0.00           C  
ATOM     21  NE1 TRP   284      67.314 -42.626  16.739  1.00  0.00           N  
ATOM     22  CE2 TRP   284      67.652 -43.342  15.610  1.00  0.00           C  
ATOM     23  CE3 TRP   284      66.496 -44.643  13.947  1.00  0.00           C  
ATOM     24  CZ2 TRP   284      68.863 -43.561  15.017  1.00  0.00           C  
ATOM     25  CZ3 TRP   284      67.720 -44.866  13.352  1.00  0.00           C  
ATOM     26  CH2 TRP   284      68.880 -44.334  13.878  1.00  0.00           C  
ATOM     27  C   TRP   284      63.754 -44.915  17.856  1.00  0.00           C  
ATOM     28  O   TRP   284      64.483 -45.684  18.478  1.00  0.00           O  
ATOM     29  H   TRP   284      61.572 -44.827  15.535  1.00  0.00           H  
ATOM     30  HA  TRP   284      64.056 -45.972  16.016  1.00  0.00           H  
ATOM     31  HB2 TRP   284      63.806 -43.962  14.612  1.00  0.00           H  
ATOM     32  HB3 TRP   284      63.327 -43.008  16.035  1.00  0.00           H  
ATOM     33  HD1 TRP   284      65.404 -42.241  17.722  1.00  0.00           H  
ATOM     34  HE1 TRP   284      67.958 -42.126  17.335  1.00  0.00           H  
ATOM     35  HE3 TRP   284      65.588 -45.056  13.535  1.00  0.00           H  
ATOM     36  HZ2 TRP   284      69.771 -43.144  15.427  1.00  0.00           H  
ATOM     37  HZ3 TRP   284      67.772 -45.468  12.457  1.00  0.00           H  
ATOM     38  HH2 TRP   284      69.821 -44.528  13.385  1.00  0.00           H  
ATOM     39  N   GLU   285      63.139 -43.877  18.445  1.00  0.00           N  
ATOM     40  CA  GLU   285      63.362 -43.522  19.818  1.00  0.00           C  
ATOM     41  C   GLU   285      62.703 -44.494  20.742  1.00  0.00           C  
ATOM     42  O   GLU   285      63.185 -44.718  21.851  1.00  0.00           O  
ATOM     43  CB  GLU   285      62.884 -42.065  20.036  1.00  0.00           C  
ATOM     44  CG  GLU   285      63.234 -41.485  21.414  1.00  0.00           C  
ATOM     45  CD  GLU   285      64.750 -41.364  21.615  1.00  0.00           C  
ATOM     46  OE1 GLU   285      65.349 -40.478  20.965  1.00  0.00           O  
ATOM     47  OE2 GLU   285      65.288 -42.168  22.406  1.00  0.00           O1-
ATOM     48  H   GLU   285      62.495 -43.322  17.900  1.00  0.00           H  
ATOM     49  HA  GLU   285      64.426 -43.573  20.050  1.00  0.00           H  
ATOM     50  HB2 GLU   285      63.344 -41.436  19.274  1.00  0.00           H  
ATOM     51  HB3 GLU   285      61.800 -42.041  19.921  1.00  0.00           H  
ATOM     52  HG2 GLU   285      62.828 -42.139  22.185  1.00  0.00           H  
ATOM     53  HG3 GLU   285      62.786 -40.495  21.504  1.00  0.00           H  
ATOM     54  N   TYR   286      61.574 -45.086  20.311  1.00  0.00           N  
ATOM     55  CA  TYR   286      60.785 -45.915  21.180  1.00  0.00           C  
ATOM     56  CB  TYR   286      59.308 -45.476  21.063  1.00  0.00           C  
ATOM     57  CG  TYR   286      58.400 -46.146  22.031  1.00  0.00           C  
ATOM     58  CD1 TYR   286      58.620 -46.061  23.387  1.00  0.00           C  
ATOM     59  CD2 TYR   286      57.278 -46.797  21.577  1.00  0.00           C  
ATOM     60  CE1 TYR   286      57.758 -46.664  24.273  1.00  0.00           C  
ATOM     61  CE2 TYR   286      56.413 -47.399  22.457  1.00  0.00           C  
ATOM     62  CZ  TYR   286      56.658 -47.341  23.807  1.00  0.00           C  
ATOM     63  OH  TYR   286      55.768 -47.960  24.709  1.00  0.00           O  
ATOM     64  C   TYR   286      60.954 -47.357  20.774  1.00  0.00           C  
ATOM     65  O   TYR   286      60.313 -47.831  19.835  1.00  0.00           O  
ATOM     66  H   TYR   286      61.275 -44.944  19.356  1.00  0.00           H  
ATOM     67  HA  TYR   286      61.107 -45.812  22.217  1.00  0.00           H  
ATOM     68  HB2 TYR   286      59.256 -44.400  21.233  1.00  0.00           H  
ATOM     69  HB3 TYR   286      58.962 -45.702  20.055  1.00  0.00           H  
ATOM     70  HD1 TYR   286      59.477 -45.517  23.757  1.00  0.00           H  
ATOM     71  HD2 TYR   286      57.075 -46.836  20.517  1.00  0.00           H  
ATOM     72  HE1 TYR   286      57.947 -46.604  25.335  1.00  0.00           H  
ATOM     73  HE2 TYR   286      55.540 -47.918  22.088  1.00  0.00           H  
ATOM     74  HH  TYR   286      55.018 -48.400  24.301  1.00  0.00           H  
ATOM     75  N   SER   287      61.815 -48.091  21.521  1.00  0.00           N  
ATOM     76  CA  SER   287      62.197 -49.454  21.248  1.00  0.00           C  
ATOM     77  CB  SER   287      63.619 -49.778  21.751  1.00  0.00           C  
ATOM     78  OG  SER   287      63.990 -51.107  21.416  1.00  0.00           O  
ATOM     79  C   SER   287      61.248 -50.413  21.888  1.00  0.00           C  
ATOM     80  O   SER   287      61.349 -51.734  21.604  1.00  0.00           O1-
ATOM     81  O   SER   287      60.380 -50.031  22.665  1.00  0.00           O  
ATOM     82  H   SER   287      62.220 -47.648  22.334  1.00  0.00           H  
ATOM     83  HA  SER   287      62.173 -49.561  20.164  1.00  0.00           H  
ATOM     84  HB2 SER   287      63.648 -49.663  22.835  1.00  0.00           H  
ATOM     85  HB3 SER   287      64.325 -49.085  21.293  1.00  0.00           H  
ATOM     86  HG  SER   287      63.356 -51.699  21.829  1.00  0.00           H  
TER      87      SER   287 
HETATM   88  C1  AB1 B1001      59.948 -48.358  15.217  1.00  0.00           C  
HETATM   89  C2  AB1 B1001      61.720 -46.790  16.115  1.00  0.00           C  
HETATM   90  N1  AB1 B1001      62.164 -45.353  16.135  1.00  0.00           N1+
HETATM   91  N2  AB1 B1001      58.794 -48.484  14.282  1.00  0.00           N1+
HETATM   92  C21 AB1 B1001      57.510 -47.884  14.728  1.00  0.00           C  
HETATM   93  C4  AB1 B1001      58.659 -45.785  22.636  1.00  0.00           C  
HETATM   94  C5  AB1 B1001      57.766 -46.016  21.427  1.00  0.00           C  
HETATM   95  C6  AB1 B1001      56.989 -47.316  21.512  1.00  0.00           C  
HETATM   96  C7  AB1 B1001      56.194 -47.410  22.799  1.00  0.00           C  
HETATM   97  C8  AB1 B1001      57.054 -47.181  24.030  1.00  0.00           C  
HETATM   98  C9  AB1 B1001      57.842 -45.888  23.925  1.00  0.00           C  
HETATM   99  C10 AB1 B1001      63.664 -45.105  16.285  1.00  0.00           C  
HETATM  100  C11 AB1 B1001      64.011 -45.147  17.781  1.00  0.00           C  
HETATM  101  N3  AB1 B1001      63.483 -43.961  18.545  1.00  0.00           N1+
HETATM  102  C12 AB1 B1001      63.327 -44.227  20.014  1.00  0.00           C  
HETATM  103  C13 AB1 B1001      64.106 -43.797  15.587  1.00  0.00           C  
HETATM  104  C14 AB1 B1001      65.606 -43.527  15.778  1.00  0.00           C  
HETATM  105  C15 AB1 B1001      63.832 -43.837  14.084  1.00  0.00           C  
HETATM  106  C16 AB1 B1001      60.905 -41.447  19.378  1.00  0.00           C  
HETATM  107  C17 AB1 B1001      61.625 -41.075  18.187  1.00  0.00           C  
HETATM  108  C18 AB1 B1001      62.933 -40.789  18.237  1.00  0.00           C  
HETATM  109  C19 AB1 B1001      63.713 -40.844  19.520  1.00  0.00           C  
HETATM  110  C20 AB1 B1001      63.031 -41.629  20.661  1.00  0.00           C  
HETATM  111  C21 AB1 B1001      61.542 -41.709  20.527  1.00  0.00           C  
HETATM  112  C22 AB1 B1001      63.659 -43.005  20.890  1.00  0.00           C  
HETATM  113  C23 AB1 B1001      61.964 -44.896  20.186  1.00  0.00           C  
HETATM  114  C24 AB1 B1001      61.688 -45.428  21.578  1.00  0.00           C  
HETATM  115  C25 AB1 B1001      60.826 -46.720  21.538  1.00  0.00           C  
HETATM  116  N4  AB1 B1001      61.721 -47.898  21.797  1.00  0.00           N1+
HETATM  117  C26 AB1 B1001      62.573 -48.542  20.763  1.00  0.00           C  
HETATM  118  C27 AB1 B1001      62.725 -49.986  21.244  1.00  0.00           C  
HETATM  119  O3  AB1 B1001      61.373 -50.353  21.540  1.00  0.00           O  
HETATM  120  C28 AB1 B1001      61.213 -51.608  22.189  1.00  0.00           C  
HETATM  121  O4  AB1 B1001      62.931 -45.717  22.228  1.00  0.00           O  
HETATM  122  C29 AB1 B1001      59.828 -46.761  22.709  1.00  0.00           C  
HETATM  123  C30 AB1 B1001      60.762 -51.317  23.606  1.00  0.00           C  
HETATM  124  C31 AB1 B1001      59.531 -51.638  24.046  1.00  0.00           C  
HETATM  125  C32 AB1 B1001      58.496 -52.323  23.204  1.00  0.00           C  
HETATM  126  C33 AB1 B1001      58.986 -52.702  21.838  1.00  0.00           C  
HETATM  127  C34 AB1 B1001      60.209 -52.391  21.369  1.00  0.00           C  
HETATM  128  C35 AB1 B1001      60.657 -52.828  20.004  1.00  0.00           C  
HETATM  129  C36 AB1 B1001      61.769 -50.691  24.530  1.00  0.00           C  
HETATM  130  C37 AB1 B1001      60.394 -46.908  15.364  1.00  0.00           C  
HETATM  131  H11 AB1 B1001      60.747 -48.971  14.788  1.00  0.00           H  
HETATM  132  H12 AB1 B1001      59.649 -48.794  16.176  1.00  0.00           H  
HETATM  133  H21 AB1 B1001      62.498 -47.371  15.609  1.00  0.00           H  
HETATM  134  H22 AB1 B1001      61.633 -47.112  17.156  1.00  0.00           H  
HETATM  135  H1  AB1 B1001      61.784 -44.844  15.323  1.00  0.00           H  
HETATM  136  H23 AB1 B1001      59.029 -48.115  13.348  1.00  0.00           H  
HETATM  137 H211 AB1 B1001      56.749 -48.160  13.993  1.00  0.00           H  
HETATM  138 H212 AB1 B1001      57.623 -46.799  14.763  1.00  0.00           H  
HETATM  139 H213 AB1 B1001      57.259 -48.294  15.709  1.00  0.00           H  
HETATM  140  H22 AB1 B1001      58.618 -49.487  14.110  1.00  0.00           H  
HETATM  141  H4  AB1 B1001      59.053 -44.764  22.577  1.00  0.00           H  
HETATM  142  H51 AB1 B1001      57.048 -45.187  21.359  1.00  0.00           H  
HETATM  143  H52 AB1 B1001      58.337 -45.984  20.493  1.00  0.00           H  
HETATM  144  H61 AB1 B1001      57.669 -48.172  21.431  1.00  0.00           H  
HETATM  145  H62 AB1 B1001      56.305 -47.387  20.658  1.00  0.00           H  
HETATM  146  H71 AB1 B1001      55.711 -48.392  22.864  1.00  0.00           H  
HETATM  147  H72 AB1 B1001      55.387 -46.666  22.780  1.00  0.00           H  
HETATM  148  H81 AB1 B1001      56.413 -47.146  24.919  1.00  0.00           H  
HETATM  149  H82 AB1 B1001      57.728 -48.033  24.175  1.00  0.00           H  
HETATM  150  H91 AB1 B1001      57.138 -45.045  23.963  1.00  0.00           H  
HETATM  151  H92 AB1 B1001      58.490 -45.779  24.803  1.00  0.00           H  
HETATM  152  H10 AB1 B1001      64.158 -45.949  15.788  1.00  0.00           H  
HETATM  153 H111 AB1 B1001      65.094 -45.163  17.945  1.00  0.00           H  
HETATM  154 H112 AB1 B1001      63.606 -46.059  18.229  1.00  0.00           H  
HETATM  155  H32 AB1 B1001      64.160 -43.191  18.435  1.00  0.00           H  
HETATM  156  H31 AB1 B1001      62.600 -43.573  18.176  1.00  0.00           H  
HETATM  157  H12 AB1 B1001      64.105 -44.966  20.245  1.00  0.00           H  
HETATM  158  H13 AB1 B1001      63.549 -42.949  16.002  1.00  0.00           H  
HETATM  159 H141 AB1 B1001      65.919 -42.644  15.210  1.00  0.00           H  
HETATM  160 H142 AB1 B1001      66.208 -44.377  15.440  1.00  0.00           H  
HETATM  161 H143 AB1 B1001      65.851 -43.328  16.825  1.00  0.00           H  
HETATM  162 H151 AB1 B1001      64.308 -44.706  13.616  1.00  0.00           H  
HETATM  163 H152 AB1 B1001      62.763 -43.876  13.860  1.00  0.00           H  
HETATM  164 H153 AB1 B1001      64.220 -42.938  13.592  1.00  0.00           H  
HETATM  165  H16 AB1 B1001      59.820 -41.483  19.324  1.00  0.00           H  
HETATM  166  H17 AB1 B1001      61.062 -40.954  17.265  1.00  0.00           H  
HETATM  167  H18 AB1 B1001      63.442 -40.423  17.348  1.00  0.00           H  
HETATM  168 H191 AB1 B1001      63.866 -39.806  19.847  1.00  0.00           H  
HETATM  169 H192 AB1 B1001      64.715 -41.238  19.317  1.00  0.00           H  
HETATM  170  H20 AB1 B1001      63.234 -41.050  21.573  1.00  0.00           H  
HETATM  171  H21 AB1 B1001      60.961 -41.953  21.414  1.00  0.00           H  
HETATM  172 H221 AB1 B1001      64.752 -42.879  20.868  1.00  0.00           H  
HETATM  173 H222 AB1 B1001      63.450 -43.274  21.933  1.00  0.00           H  
HETATM  174 H231 AB1 B1001      61.136 -44.255  19.870  1.00  0.00           H  
HETATM  175 H232 AB1 B1001      61.915 -45.744  19.491  1.00  0.00           H  
HETATM  176  H24 AB1 B1001      61.197 -44.634  22.150  1.00  0.00           H  
HETATM  177  H25 AB1 B1001      60.319 -46.894  20.586  1.00  0.00           H  
HETATM  178  H42 AB1 B1001      62.347 -47.612  22.567  1.00  0.00           H  
HETATM  179  H41 AB1 B1001      61.147 -48.694  22.149  1.00  0.00           H  
HETATM  180 H261 AB1 B1001      62.018 -48.497  19.821  1.00  0.00           H  
HETATM  181 H262 AB1 B1001      63.521 -48.003  20.686  1.00  0.00           H  
HETATM  182 H271 AB1 B1001      63.348 -50.042  22.142  1.00  0.00           H  
HETATM  183 H272 AB1 B1001      63.133 -50.628  20.458  1.00  0.00           H  
HETATM  184  H28 AB1 B1001      62.155 -52.173  22.220  1.00  0.00           H  
HETATM  185  H4  AB1 B1001      62.955 -45.220  23.072  1.00  0.00           H  
HETATM  186 H291 AB1 B1001      59.439 -47.782  22.800  1.00  0.00           H  
HETATM  187 H292 AB1 B1001      60.381 -46.579  23.643  1.00  0.00           H  
HETATM  188  H31 AB1 B1001      59.241 -51.421  25.071  1.00  0.00           H  
HETATM  189 H321 AB1 B1001      57.623 -51.669  23.105  1.00  0.00           H  
HETATM  190 H322 AB1 B1001      58.170 -53.233  23.723  1.00  0.00           H  
HETATM  191  H33 AB1 B1001      58.292 -53.269  21.223  1.00  0.00           H  
HETATM  192 H351 AB1 B1001      61.565 -53.435  20.078  1.00  0.00           H  
HETATM  193 H352 AB1 B1001      60.870 -51.959  19.373  1.00  0.00           H  
HETATM  194 H353 AB1 B1001      59.897 -53.430  19.493  1.00  0.00           H  
HETATM  195 H361 AB1 B1001      62.692 -51.280  24.542  1.00  0.00           H  
HETATM  196 H362 AB1 B1001      61.402 -50.635  25.561  1.00  0.00           H  
HETATM  197 H363 AB1 B1001      62.007 -49.672  24.211  1.00  0.00           H  
HETATM  198 H371 AB1 B1001      59.628 -46.328  15.894  1.00  0.00           H  
HETATM  199 H372 AB1 B1001      60.501 -46.460  14.368  1.00  0.00           H  
CONECT   75   82   76
CONECT   76   75   83   77   79
CONECT   77   76   84   85   78
CONECT   78   77   86
CONECT   79   76   80   81   81
CONECT   80   79
CONECT   81   79   79
CONECT   82   75
CONECT   83   76
CONECT   84   77
CONECT   85   77
CONECT   86   78
CONECT   88   91  130  131  132
CONECT   89   90  130  133  134
CONECT   90   89   99  135
CONECT   91   88   92  136  140
CONECT   92   91  137  138  139
CONECT   93   94   98  122  141
CONECT   94   93   95  142  143
CONECT   95   94   96  144  145
CONECT   96   95   97  146  147
CONECT   97   96   98  148  149
CONECT   98   93   97  150  151
CONECT   99   90  100  103  152
CONECT  100   99  101  153  154
CONECT  101  100  102  155  156
CONECT  102  101  112  113  157
CONECT  103   99  104  105  158
CONECT  104  103  159  160  161
CONECT  105  103  162  163  164
CONECT  106  107  111  111  165
CONECT  107  106  108  108  166
CONECT  108  107  107  109  167
CONECT  109  108  110  168  169
CONECT  110  109  111  112  170
CONECT  111  106  106  110  171
CONECT  112  102  110  172  173
CONECT  113  102  114  174  175
CONECT  114  113  115  121  176
CONECT  115  114  116  122  177
CONECT  116  115  117  178  179
CONECT  117  116  118  180  181
CONECT  118  117  119  182  183
CONECT  119  118  120
CONECT  120  119  123  127  184
CONECT  121  114  185
CONECT  122   93  115  186  187
CONECT  123  120  124  124  129
CONECT  124  123  123  125  188
CONECT  125  124  126  189  190
CONECT  126  125  127  127  191
CONECT  127  120  126  126  128
CONECT  128  127  192  193  194
CONECT  129  123  195  196  197
CONECT  130   88   89  198  199
CONECT  131   88
CONECT  132   88
CONECT  133   89
CONECT  134   89
CONECT  135   90
CONECT  136   91
CONECT  137   92
CONECT  138   92
CONECT  139   92
CONECT  140   91
CONECT  141   93
CONECT  142   94
CONECT  143   94
CONECT  144   95
CONECT  145   95
CONECT  146   96
CONECT  147   96
CONECT  148   97
CONECT  149   97
CONECT  150   98
CONECT  151   98
CONECT  152   99
CONECT  153  100
CONECT  154  100
CONECT  155  101
CONECT  156  101
CONECT  157  102
CONECT  158  103
CONECT  159  104
CONECT  160  104
CONECT  161  104
CONECT  162  105
CONECT  163  105
CONECT  164  105
CONECT  165  106
CONECT  166  107
CONECT  167  108
CONECT  168  109
CONECT  169  109
CONECT  170  110
CONECT  171  111
CONECT  172  112
CONECT  173  112
CONECT  174  113
CONECT  175  113
CONECT  176  114
CONECT  177  115
CONECT  178  116
CONECT  179  116
CONECT  180  117
CONECT  181  117
CONECT  182  118
CONECT  183  118
CONECT  184  120
CONECT  185  121
CONECT  186  122
CONECT  187  122
CONECT  188  124
CONECT  189  125
CONECT  190  125
CONECT  191  126
CONECT  192  128
CONECT  193  128
CONECT  194  128
CONECT  195  129
CONECT  196  129
CONECT  197  129
CONECT  198  130
CONECT  199  130
END
